# Supplementary material for: A Food-Grade Resin with LDH–Salicylate to Extend Mozzarella Cheese Shelf Life
Source: MDPI journal article supplement (doi:10.3390/pr9050884), 2021-05-18

## Supplementary Materials

**Supplementary Table S1:** Inhibition growth of three pathogenic strains on the prepared Active Packaging after 24 h of incubation (ISO 22196:2011). U0: Counts bacteria recovered from non treated specimens after the inoculums; Ut: Count of bacteria recovered from non-treated samples after 24 h from inoculation; At: Count of bacteria recovered from treated samples after 24 h from inoculation. R: Antibacterial activity

| Bacterial strain                                           | <i>P. aeruginosa</i><br>ATCC 15442    | <i>E. coli</i><br>ATCC 8739           | <i>S. aureus</i><br>ATCC 6538         |
|------------------------------------------------------------|---------------------------------------|---------------------------------------|---------------------------------------|
| Sample size                                                | 50 x 50 (mm x mm)                     | 40 x 40 (mm x mm)                     | 40 x 40 (mm x mm)                     |
| Sample thickness                                           | 1.0 mm                                | 0.070 mm                              | 0.070 mm                              |
| Inoculum volume                                            | 0.4 mL                                | 0.4 mL                                | 0.4 mL                                |
| U <sub>0</sub>                                             | 4.4±0.0026 (Log CFU/cm <sup>2</sup> ) | 4.3±0.0024 (Log CFU/cm <sup>2</sup> ) | 4.1±0.0021 (Log CFU/cm <sup>2</sup> ) |
| U <sub>t</sub>                                             | 5.3±0.0032 (Log CFU/cm <sup>2</sup> ) | 5.7±0.0034 (Log CFU/cm <sup>2</sup> ) | 5.4±0.0035 (Log CFU/cm <sup>2</sup> ) |
| At                                                         | n.d.*                                 | 4.6±0.0025 (Log CFU/cm <sup>2</sup> ) | 3.8±0.0021 (Log CFU/cm <sup>2</sup> ) |
| R = (U <sub>t</sub> -U <sub>0</sub> )-(At-U <sub>0</sub> ) | >4.3                                  | 1.1                                   | 1.6                                   |

\*not detectable (< limit of detection, DL=1)

**Supplementary Table S2:** Global migration and specific migration of salicylic acid from the Active Packaging

| Simulant                                 | B –<br>Acetic acid at 3% (v/v)                                                                                  | D1 –<br>Ethanol at 50% (v/v)                                                                                    | Limits                   |
|------------------------------------------|-----------------------------------------------------------------------------------------------------------------|-----------------------------------------------------------------------------------------------------------------|--------------------------|
|                                          | Global migration into aqueous food simulant by filling a container<br>UNI EN 1186-1: 2003 + UNI EN 1186-9: 2003 | Global migration into aqueous food simulant by filling a container<br>UNI EN 1186-1: 2003 + UNI EN 1186-9: 2003 |                          |
| Temperature of the test                  | 40 °C                                                                                                           | 40 °C                                                                                                           |                          |
| Contact time                             | 10 days                                                                                                         | 10 days                                                                                                         |                          |
| Global migration average in the simulant | 7.4 (mg/dm <sup>2</sup> )                                                                                       | 8.7 (mg/dm <sup>2</sup> )                                                                                       | 10 (mg/dm <sup>2</sup> ) |

**Supplementary Table S3:** Texture profile analysis of Mozzarella cheese samples stored at 4 and 15°C in coated and uncoated packages for 10 days\*

|               | Hardness (N)          | Cohesiveness         | Springiness          | Chewiness (N)        |
|---------------|-----------------------|----------------------|----------------------|----------------------|
| Coated_4°C    | 10.34 ± 0.98 <b>b</b> | 0.77 ± 0.05 <b>a</b> | 0.88 ± 0.03 <b>a</b> | 7.06 ± 1.33 <b>b</b> |
| Uncoated_4°C  | 10.04 ± 1.04 <b>b</b> | 0.77 ± 0.02 <b>a</b> | 0.87 ± 0.01 <b>a</b> | 6.64 ± 0.71 <b>b</b> |
| Coated_15°C   | 9.79 ± 1.21 <b>b</b>  | 0.68 ± 0.06 <b>b</b> | 0.85 ± 0.02 <b>a</b> | 5.69 ± 0.93 <b>b</b> |
| Uncoated_15°C | 6.34 ± 0.12 <b>c</b>  | 0.60 ± 0.02 <b>c</b> | 0.83 ± 0.05 <b>a</b> | 3.16 ± 0.04 <b>c</b> |
| Control**     | 12.52 ± 0.41 <b>a</b> | 0.79 ± 0.01 <b>a</b> | 0.90 ± 0.01 <b>a</b> | 8.92 ± 0.26 <b>a</b> |

\*The values represent means ± standard deviation (N = 3). Values within each column showing different subscript letters represent are significantly ( $P < 0.05$ ) different according to Duncan's *post hoc test*.

\*\*Control are Mozzarella cheese produced on day of analysis.

**Supplementary Table S4:** CIELab coordinates of Mozzarella cheese samples stored at 4 and 15 °C in coated and uncoated packages for 10 days\*

|               | L*                    | a*                    | b*                   | H°                     | C*                   |
|---------------|-----------------------|-----------------------|----------------------|------------------------|----------------------|
| Coated_4°C    | 95.93 ± 0.17 <b>a</b> | -1.46 ± 0.08 <b>a</b> | 6.01 ± 0.20 <b>b</b> | 103.62 ± 0.34 <b>b</b> | 6.18 ± 0.21 <b>b</b> |
| Uncoated_4°C  | 95.86 ± 0.07 <b>a</b> | -1.56 ± 0.04 <b>b</b> | 6.34 ± 0.10 <b>b</b> | 103.85 ± 0.19 <b>b</b> | 6.53 ± 0.11 <b>b</b> |
| Coated_15°C   | 95.98 ± 0.19 <b>a</b> | -1.51 ± 0.04 <b>b</b> | 6.85 ± 0.20 <b>a</b> | 102.47 ± 0.38 <b>b</b> | 7.01 ± 0.20 <b>a</b> |
| Uncoated_15°C | 94.79 ± 1.25 <b>a</b> | -1.61 ± 0.05 <b>b</b> | 6.73 ± 0.59 <b>a</b> | 103.51 ± 0.92 <b>b</b> | 6.92 ± 0.58 <b>a</b> |
| Control**     | 95.23 ± 0.07 <b>a</b> | -1.59 ± 0.03 <b>b</b> | 6.02 ± 0.16 <b>b</b> | 104.77 ± 0.22 <b>a</b> | 6.22 ± 0.16 <b>b</b> |

\*The values represent means ± standard deviation (N = 3). Values within each column showing different subscript letters represent are significantly ( $P < 0.05$ ) different according to Duncan's *post hoc test*.

\*\*Control are Mozzarella cheese produced on day of analysis

**Supplementary Figure S1:** pH values of Mozzarella cheese samples packed with governing liquid in active and control packaging and stored at 4 °C and 15 °C. Values represents average  $\pm$  standard deviation (N = 3). \*, \*\*: significant pairwise differences ( $P < 0.05$ ;  $P < 0.001$ , respectively) between control and active samples at the same incubation temperature following 2-tailed independent Student's t test ( $P < 0.05$ ).

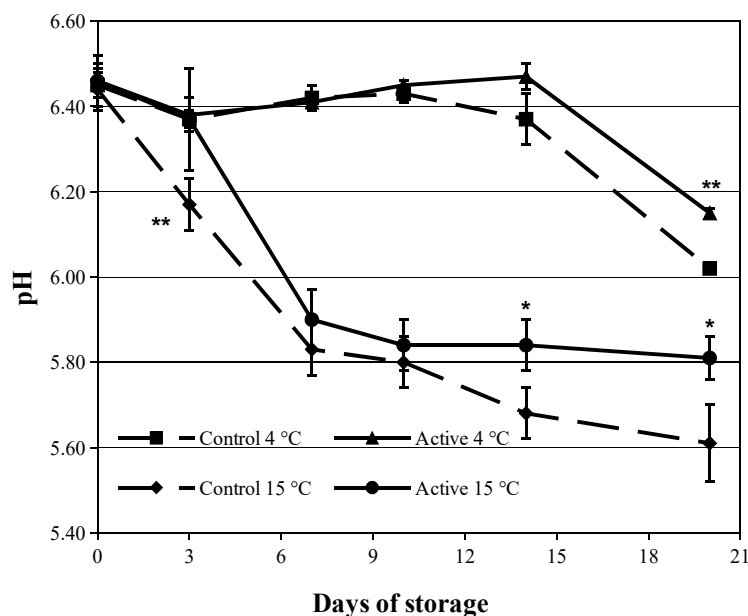

**Supplementary Figure S2:** Free amino acids and small peptide contents (FAA,  $\mu\text{g/mL}$ , as glycine equivalent) registered in governing liquid of Mozzarella cheese samples packed in active and control trays during incubation at 15 and 4 °C for 20 days. Bars represent average  $\pm$  standard deviation (N = 3). \*, \*\*: significant pairwise differences ( $P < 0.05$ ;  $P < 0.001$ , respectively) between control and active samples at the same incubation temperature according to 2-tailed independent Student's t test ( $P < 0.05$ ); n.s.: not significant.

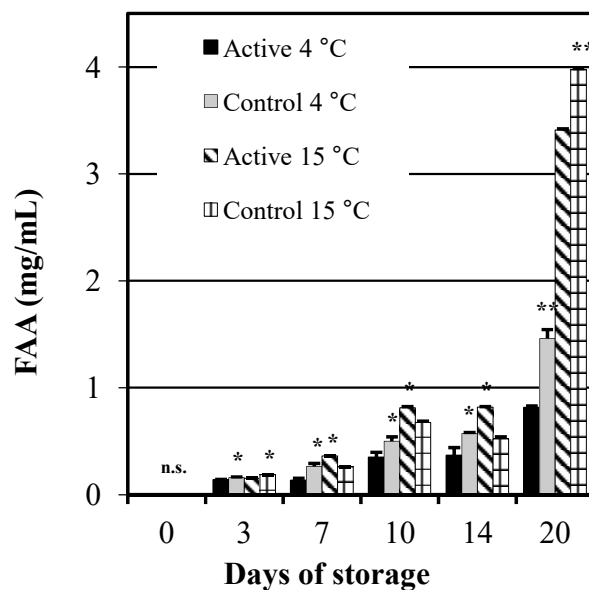

Supplement: s1 [file s1]
